# Supplementary material for: CH3NH3PbI3−xClx films with coverage approaching 100% and with highly oriented crystal domains for reproducible and efficient planar heterojunction perovskite solar cells
Source: Royal Society of Chemistry journal article supplement (doi:10.1039/c5cp03934g), 2015-01-01
Supplement: c5cp03934g1.pdf [file c5cp03934g1.pdf]

Supporting Information for

**Approaching 100% coverage  $\text{CH}_3\text{NH}_3\text{PbI}_{3-x}\text{Cl}_x$  films with highly oriented crystal domains  
for reproducible and efficient planar heterojunction perovskite solar cells**

Like Huang, Ziyang Hu\*, Guoqiang Yue, Jinwang Liu, Xiaohong Cui, Jing Zhang, Yuejin Zhu\*

Department of Microelectronic Science and Engineering,

Ningbo Collaborative Innovation Center of Nonlinear Hazard System of Ocean and Atmosphere,

Ningbo University, Ningbo, 315211, China

\* Corresponding author. Tel.: +86 574 87600770; Fax: +86 574 87600744.

E-mail addresses: huziyang@nbu.edu.cn (Z. Hu), zhuyuejin@nbu.edu.cn (Y. Zhu)

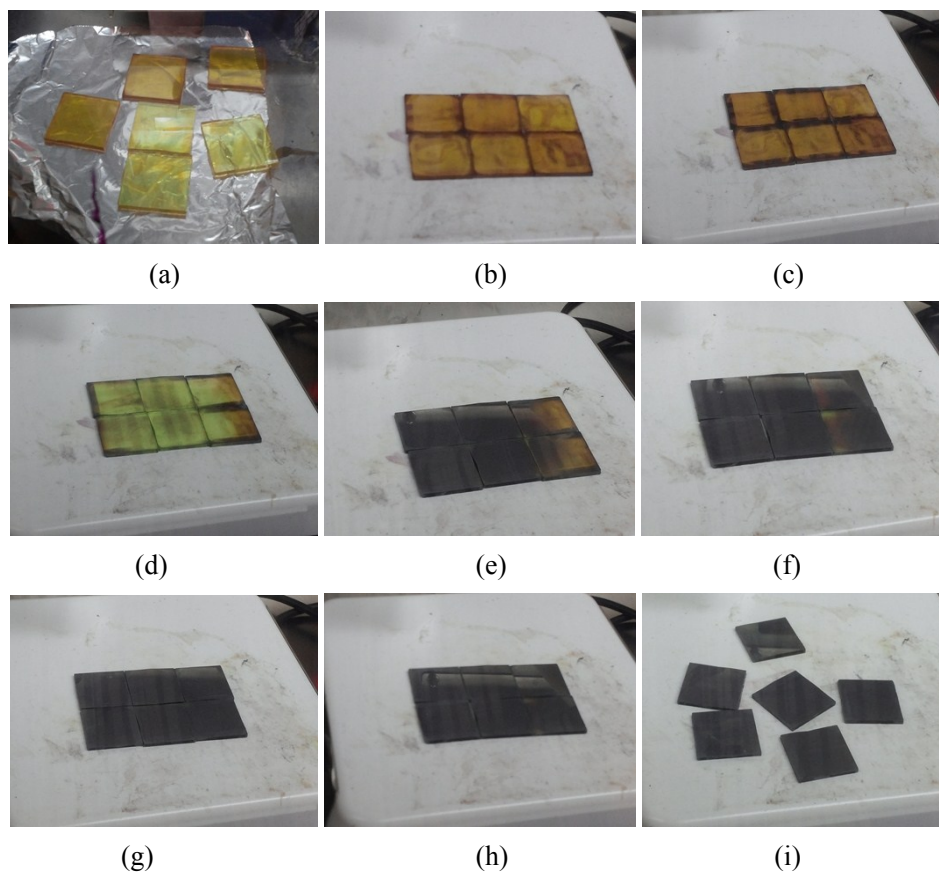

**Figure S1.** Optical images of the perovskite film heated at different stage, 0 min (a), 5 min (b), 15 min (c), 55 min (d), 65min (e), 75 min (f), 85 min (g), 95 min (h), 105 min (i), respectively.

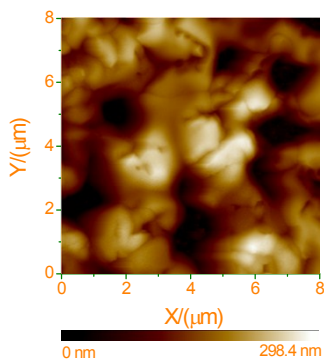

**Figure S2.** AFM image of the same perovskite /c-TiO<sub>2</sub> sample characterized in Figure 3.

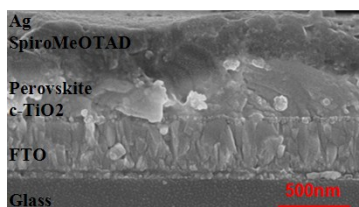

**Figure S3.** Cross-sectional SEM image of the device with a structure of Glass/FTO/c-TiO<sub>2</sub>/Perovskite/SpiroMeOTAD/Ag

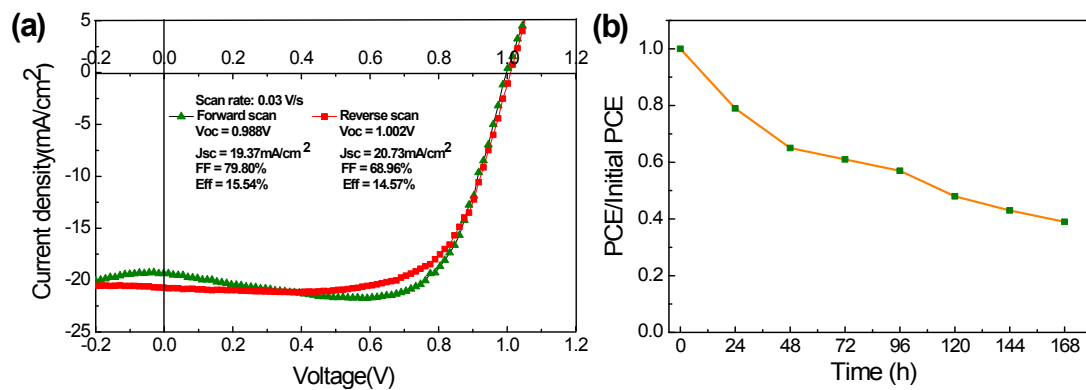

**Figure S4.** The  $J-V$  hysteresis analyze (a) and stability as a function of time (b) of the perovskite solar cell.

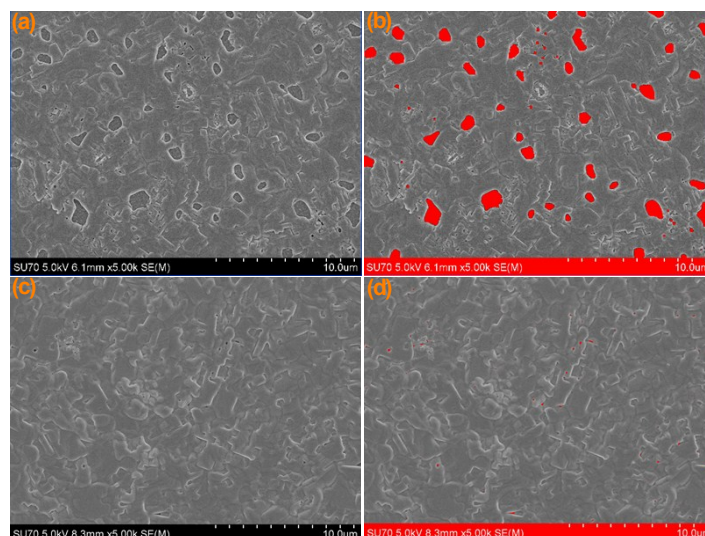

**Figure S5.** Original SEM images (a, corresponding to Fig.2 (b) in the main text) and void-labeled SEM images (b) of the perovskite film with a coverage of 95.72%. Estimated coverage is 95.63 ( $\pm 0.25\%$ ) based on the integration of the red area in (b). Original SEM images (c, corresponding to Fig.2 (d) in the main text) and void-labeled SEM images (b) of the perovskite film with a coverage approaching 100%. Estimated coverage is 99.85% ( $\pm 0.10\%$ ) based on the integration of the red area in (d).
